# Supplementary material for: HDAC1/2/3 are major histone desuccinylases critical for promoter desuccinylation
Source: PubMed Central journal article supplement (PMC10425439; doi:10.1038/s41421-023-00573-9), 2023-08-15
Supplement: 41421_2023_573_MOESM1_ESM.pdf [file 41421_2023_573_MOESM1_ESM.pdf]

**a**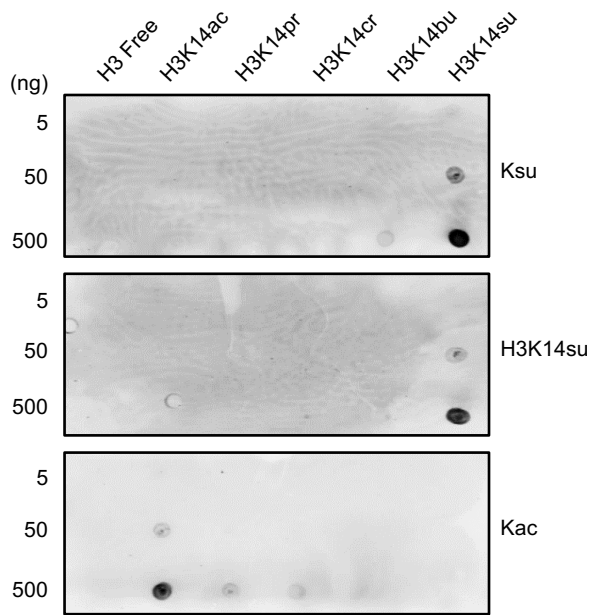**b**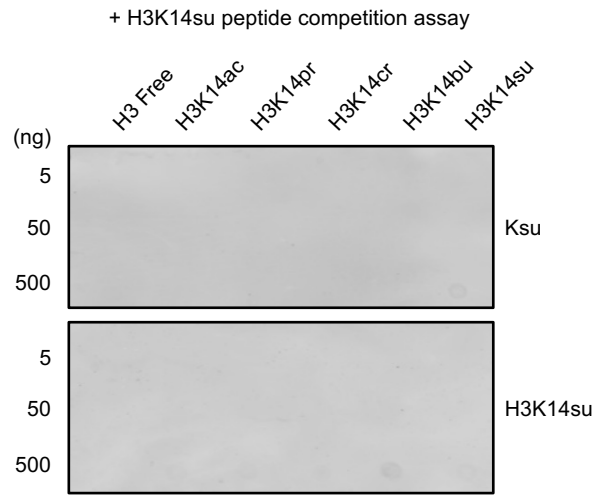

**Supplementary Fig. S1. Characterization of Ksu antibody specificity by dot blots.** **a** Dot blot was performed to evaluate the specificity of anti-pan Ksu and H3K14su-specific antibodies using various acylated H3K14 synthetic peptides. The results indicated that both Ksu and H3K14su antibodies specifically recognized H3K14 succinylated peptide but not other acylated peptides. **b** Dot blot was performed as in (a) with the addition of free H3K14su peptide (50 ng/ml). The results indicated that addition of free H3K14su peptide competitively blocked the detection of H3K14su peptide in dot blot.

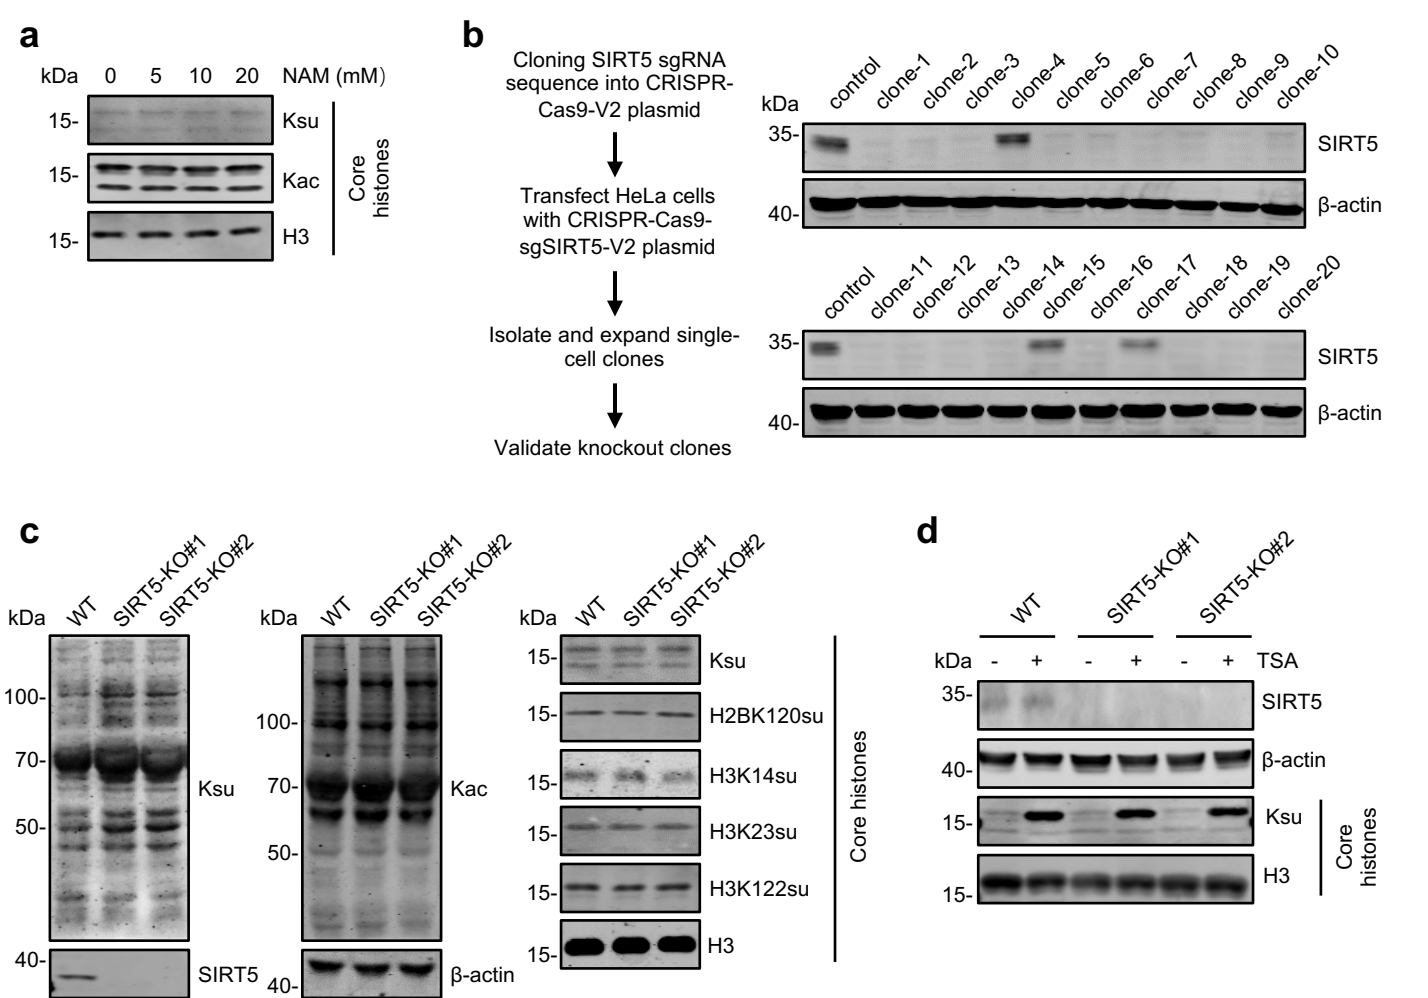

**Supplementary Fig. S2. Inhibition of SIRT family deacetylases or knockout of SIRT5 has no obvious effect on histone succinylation.** **a** WB analysis of histone succinylation and acetylation. HeLa cells were treated with an increasing concentration of SIRT inhibitor NAM for 24 h before harvested for histone preparation and WB analysis using antibodies as indicated. **b** Schematic illustration of generation of SIRT5 knockout cell lines by CRISPR-Cas9. The levels of SIRT5 in 20 single cell clones derived from CRISPR-Cas9-sgSIRT5-V2 plasmid-transfected HeLa cells were analyzed by WB. **c** WB analysis of the status of non-histone and histone protein succinylation and acetylation in control and SIRT5 knockout HeLa cells. Whole cell lysates were used for WB analysis of non-histone proteins, whereas acid-extracted histones were used for analysis of histone proteins. Two independent SIRT5 KO HeLa cell lines were used. **d** WB analysis of histone succinylation in control and SIRT5 KO HeLa cells treated with or without 1  $\mu$ M TSA for 12 h.

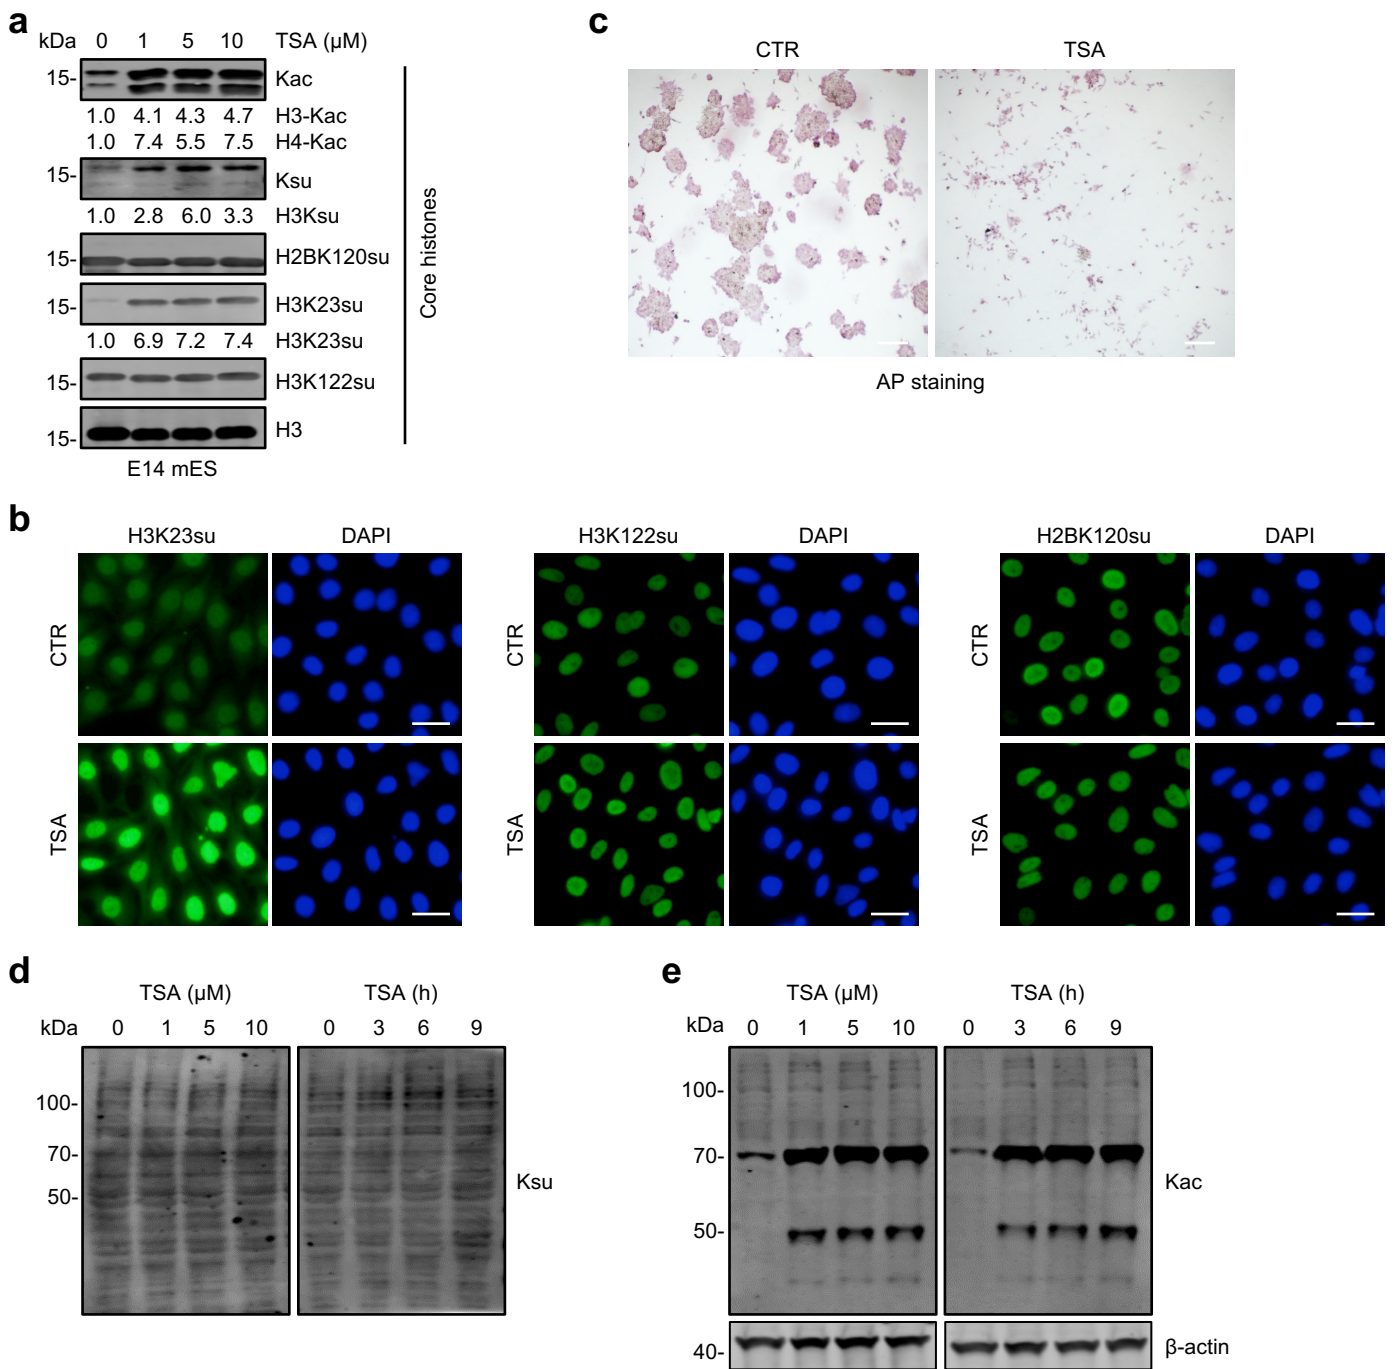

**Supplementary Fig. S3. Inhibition of HDACs induced histone succinylation but had relatively minor effect on non-histone succinylation.** **a** WB analysis showing that TSA treatment induced histone succinylation in mouse E14 ES cells. E14 ES cells were treated with different concentrations of TSA for 12 h before harvested for preparation of core histones and WB analysis using antibodies as indicated. Like the results observed in HeLa, HCT116 and MCF7 cells, TSA treatment elevated succinylation on H3K23 but did not appear to affect succinylation on H3K122 and H2BK120. **b** IF staining using histone succinylation site-specific antibodies confirmed that TSA treatment elevated H3K23su and had no effect on H3K122su and H2BK120su. HeLa cells were treated with 1  $\mu\text{M}$  TSA for 12 h before IF staining. Scale bar, 20 $\mu\text{m}$ . **c** AP (alkaline phosphatase) staining showing TSA treatment (1  $\mu\text{M}$  TSA for 12 h) impaired the self-renewal activity of E14 cells. Scale bar, 100  $\mu\text{m}$ . **d-e** WB analysis of whole cell lysates derived from HeLa cells treated with different concentrations of TSA or 1  $\mu\text{M}$  TSA for various times using pan-Ksu (**d**) or pan-Kac antibody (**e**).

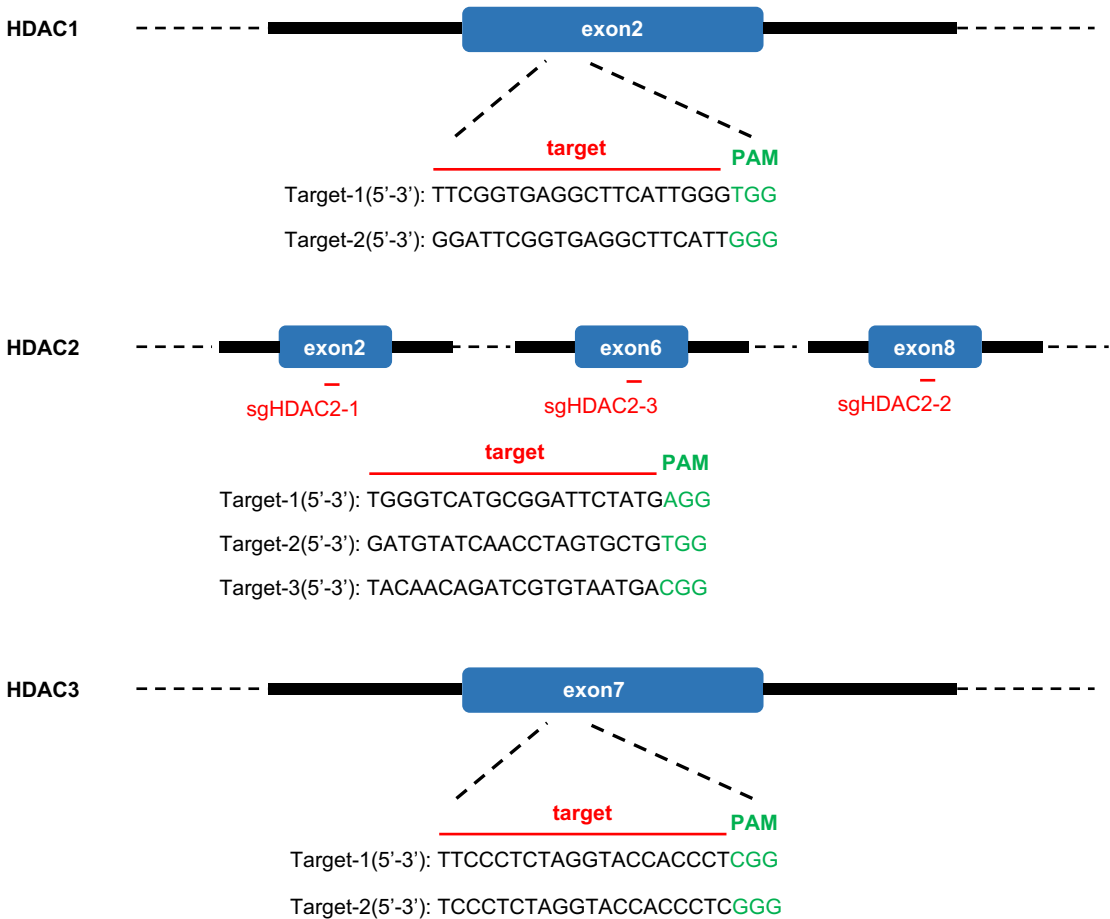

**Supplementary Fig. S4. Generation of HDAC1, HDAC2, and HDAC3 knockout HeLa cells by CRISPR-Cas9.** The diagram illustrates specific guide RNA sequences used for knockout of HDAC1, HDAC2, or HDAC3 genes. Also indicated are the specific exons targeted by corresponding guide RNAs. The experiments were carried as illustrated in Supplementary Fig. S2b but without isolation of single cell clones.

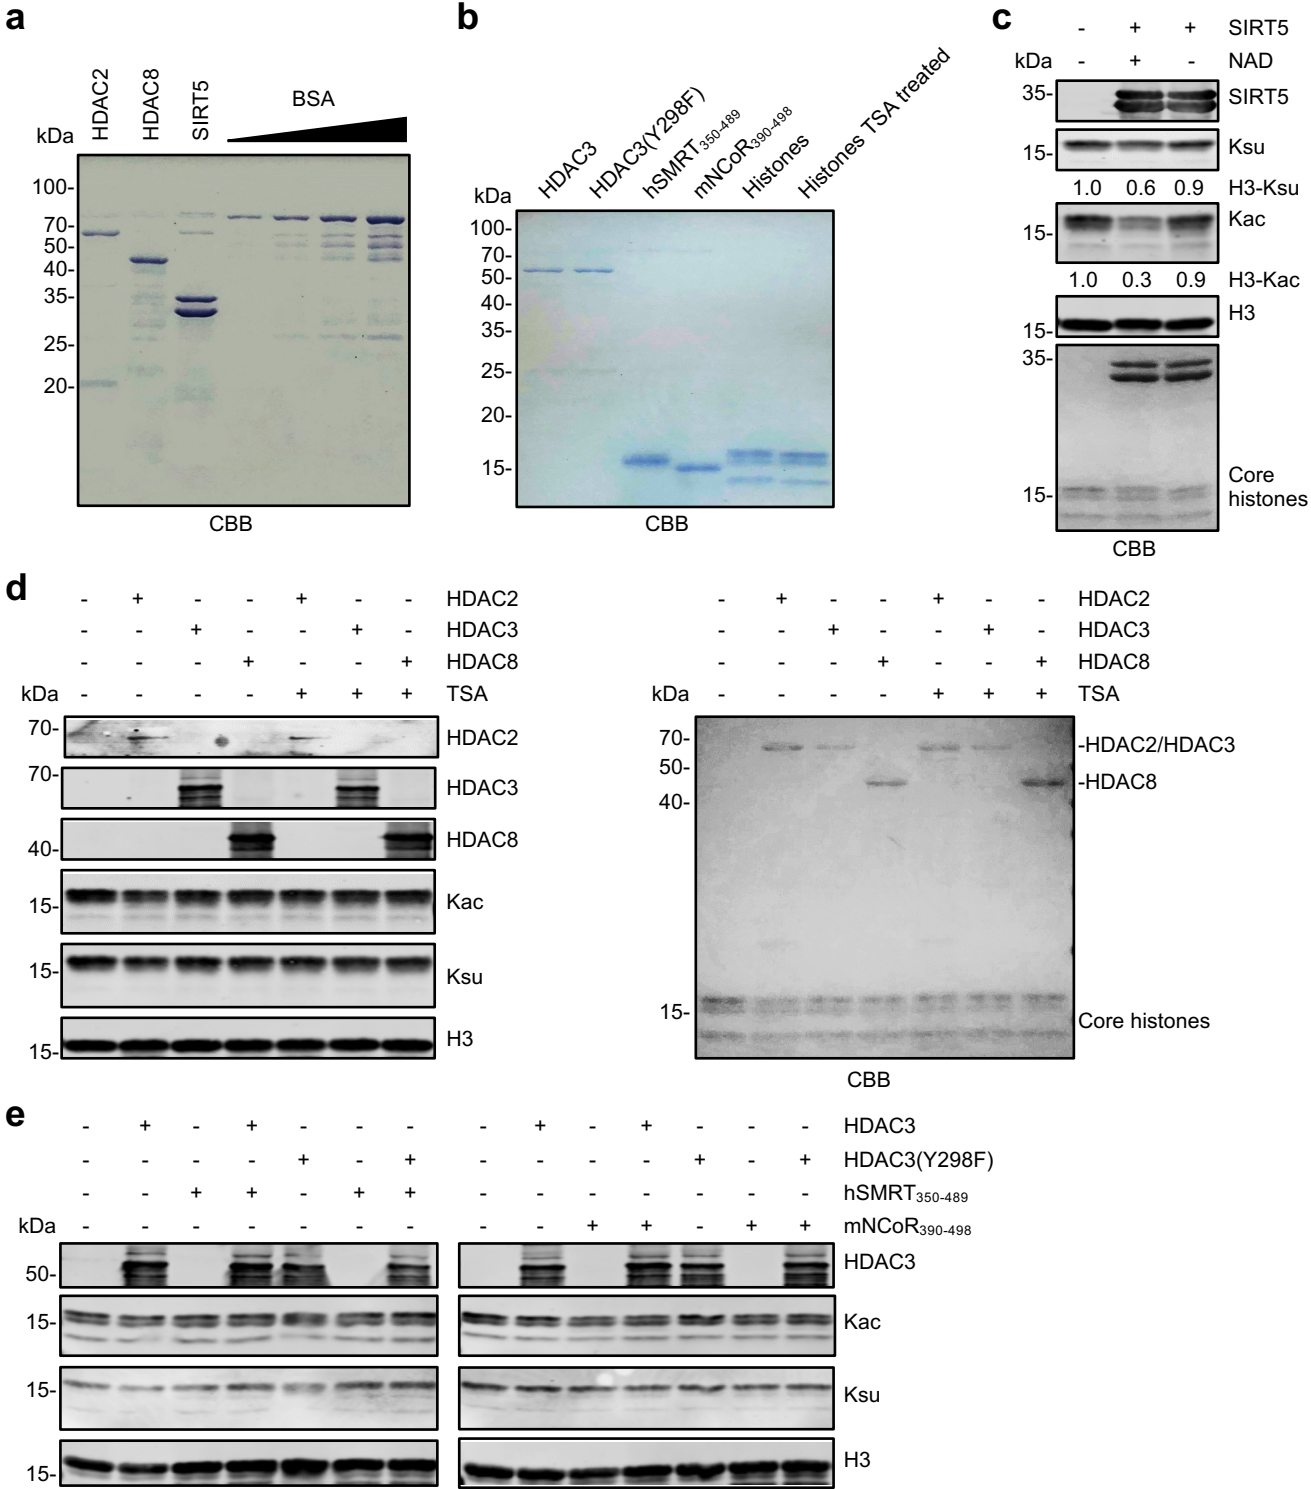

**Supplementary Fig. S5. Lack of histone desuccinylase activity for bacterial expressed HDAC2, HDAC3 and HDAC8.** **a-b** Coomassie Brilliant Blue (CBB) staining of bacterially expressed and purified HDAC2, HDAC8, and SIRT5 (**a**), and HDAC3, human SMRT, and mouse NCoR fragments (**b**). **c** *In vitro* deacetylation and desuccinylation assays confirmed both activities for recombinant SIRT5. **d** *In vitro* assays revealed lack of deacetylation and desuccinylation activity for recombinant HDAC2, HDAC3, and HDAC8. **e** *In vitro* assays showed lack of desuccinylation activity for recombinant HDAC3 even in the presence of recombinant hSMRT<sub>350-489</sub> or mNCoR<sub>390-498</sub>.

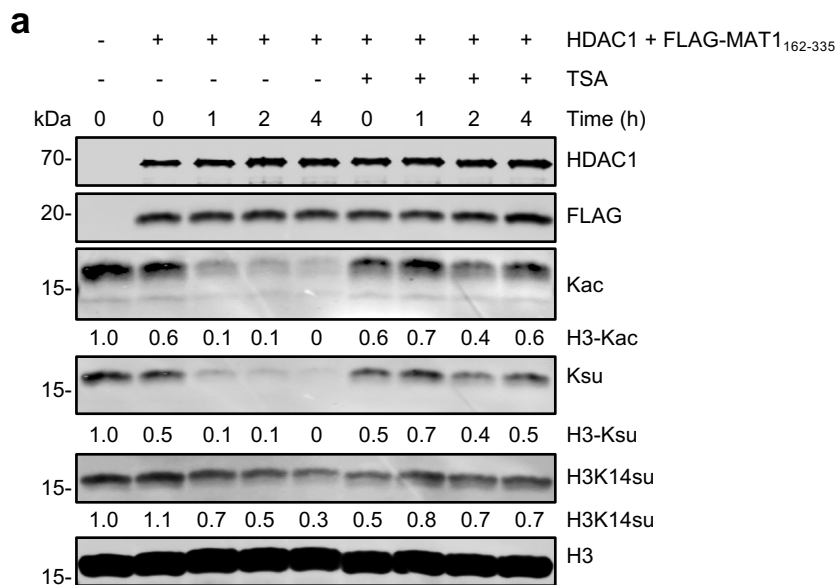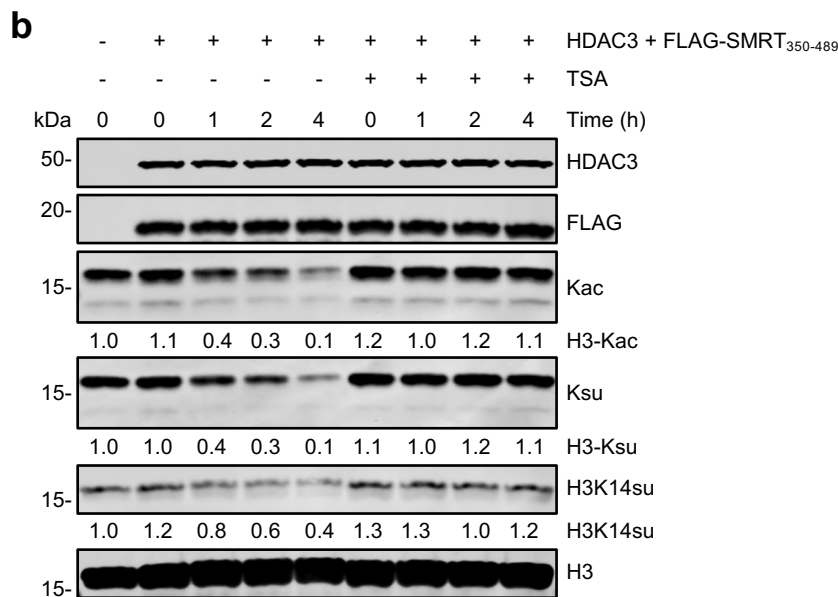

**Supplementary Fig. S6. The HDAC1 and HDAC3 minimal core complexes prepared from mammalian cells displayed robust histone desuccinylation activity in time course experiments. a-b** *In vitro* deacetylation and desuccinylation assays were performed with purified HDAC1/FLAG-MAT1<sub>162-335</sub> complex (a) or HDAC3/FLAG-SMRT<sub>350-489</sub> complex (b) as shown in Fig. 5a. The reactions were carried out for 0, 1, 2, and 4 h without or with addition of 10  $\mu$ M TSA as indicated. Histone deacetylation and desuccinylation were then evaluated by WB analysis.

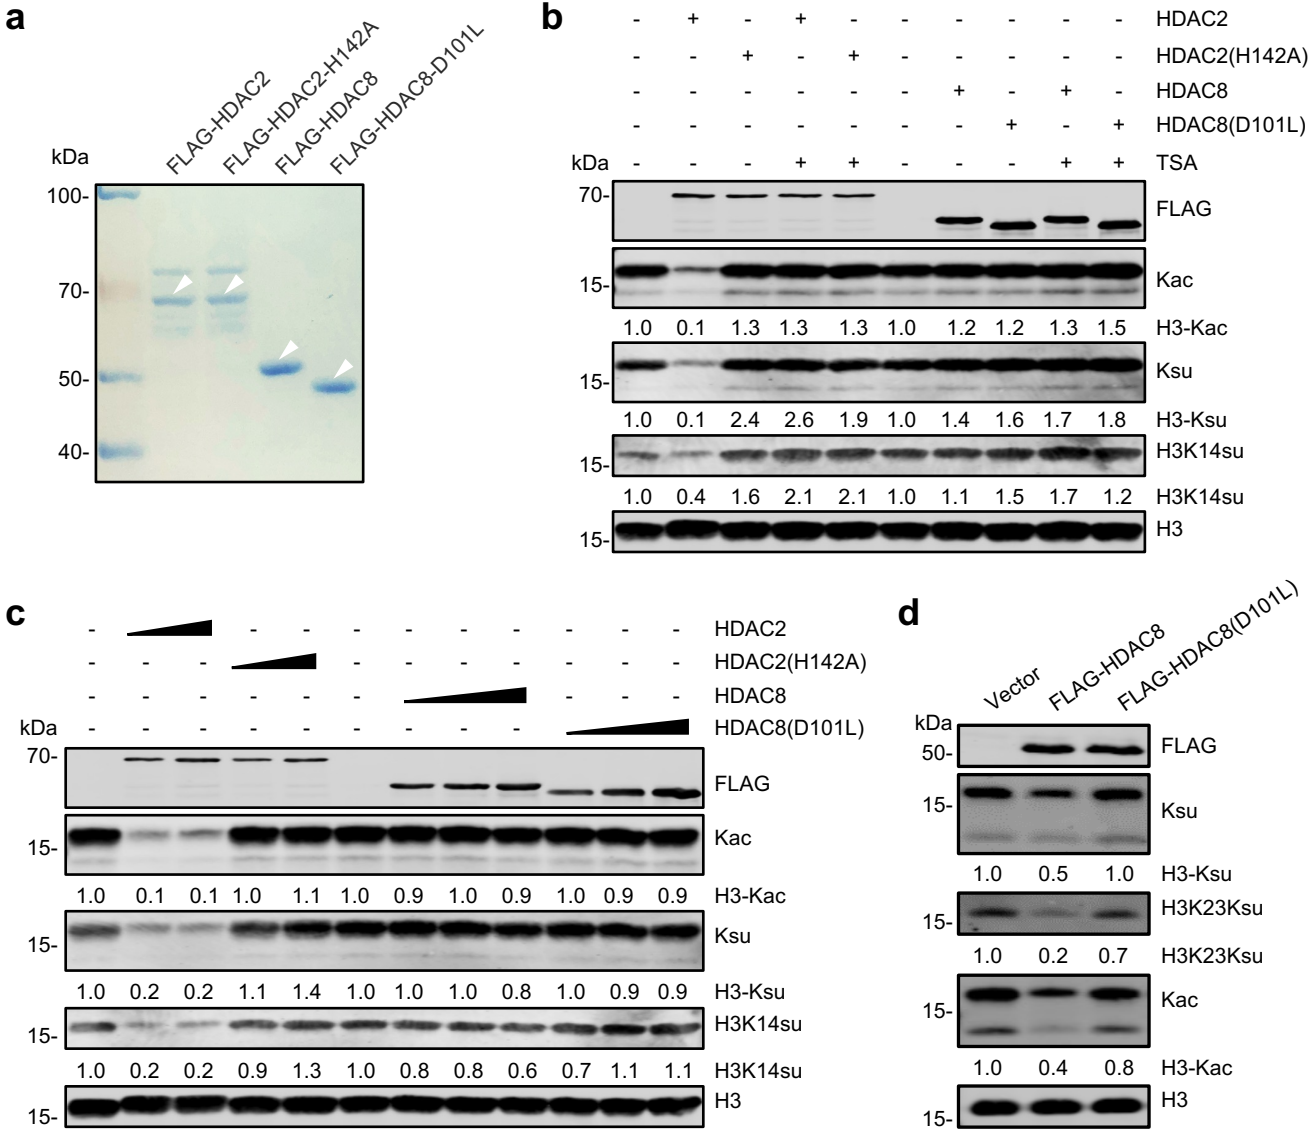

**Supplementary Fig. S7. Lack of in vitro histone desuccinylase activity for HDAC8 prepared from mammalian cells.** **a** Coomassie Brilliant Blue staining of HEK293T cell-expressed and purified HDAC2, HDAC2(H142A) mutant, HDAC8, and HDAC8(D101L) mutant. All proteins were transiently expressed in HEK293T cells, purified using anti-FLAG M2 agarose beads, and eluted by using FLAG peptide. Note that HDAC8 was essentially purified as a single protein, whereas HDAC2 was co-purified with additional proteins that were likely MAT1/2 and RBAP46/48, the components of core HDAC1/2-containing NuRD complex. White arrows marked the position of FLAG-HDAC2, FLAG-HDAC8 and their mutants. **b** In vitro deacetylation and desuccinylation assays for HDAC2 and HDAC8 purified from HEK293T cells as above. Note that wildtype HDAC2 but not HDAC2(H142A) mutant displayed robust deacetylation and desuccinylation activity in this assay. Furthermore, both HDAC2 deacetylation and desuccinylation activity could be completely blocked by addition of TSA in vitro. However, no deacetylation and desuccinylation activity was detected for HDAC8 under the same condition. **c** Lack of obvious deacetylation and desuccinylation activity for HDAC8 in in vitro assays with different doses of HDAC8. **d** WB analysis showing that ectopic overexpression of wildtype but not mutant HDAC8 resulted in reduced histone succinylation.

**a**

| Experiment          | # Reads    | #Peaks |
|---------------------|------------|--------|
| CHIP_H3K23su_DMSO_1 | 25,091,247 | 894    |
| CHIP_H3K23su_DMSO_2 | 25,581,366 | 1,387  |
| CHIP_H3K23su_DMSO_3 | 25,133,289 | 590    |
| CHIP_H3K23su_TSA_1  | 23,852,456 | 2,445  |
| CHIP_H3K23su_TSA_2  | 22,024,093 | 1,699  |
| CHIP_H3K23su_TSA_3  | 22,775,919 | 884    |
| CHIP_H3K27ac_DMSO_1 | 29,361,570 | 7,110  |
| CHIP_H3K27ac_DMSO_2 | 29,470,277 | 6,769  |
| CHIP_H3K27ac_DMSO_3 | 29,376,905 | 7,733  |
| CHIP_H3K27ac_TSA_1  | 28,954,566 | 14,459 |
| CHIP_H3K27ac_TSA_2  | 30,139,867 | 14,292 |
| CHIP_H3K27ac_TSA_3  | 31,449,059 | 15,006 |
| CHIP_Ksu_DMSO_1     | 24,675,963 | 8,067  |
| CHIP_Ksu_DMSO_2     | 25,125,203 | 8,500  |
| CHIP_Ksu_DMSO_3     | 25,062,876 | 9,696  |
| CHIP_Ksu_TSA_1      | 25,766,599 | 44,709 |
| CHIP_Ksu_TSA_2      | 26,736,351 | 47,937 |
| CHIP_Ksu_TSA_3      | 24,977,982 | 45,874 |

**b**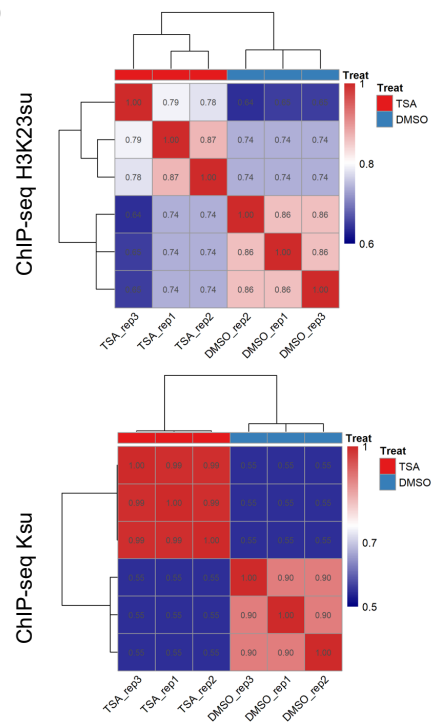**c**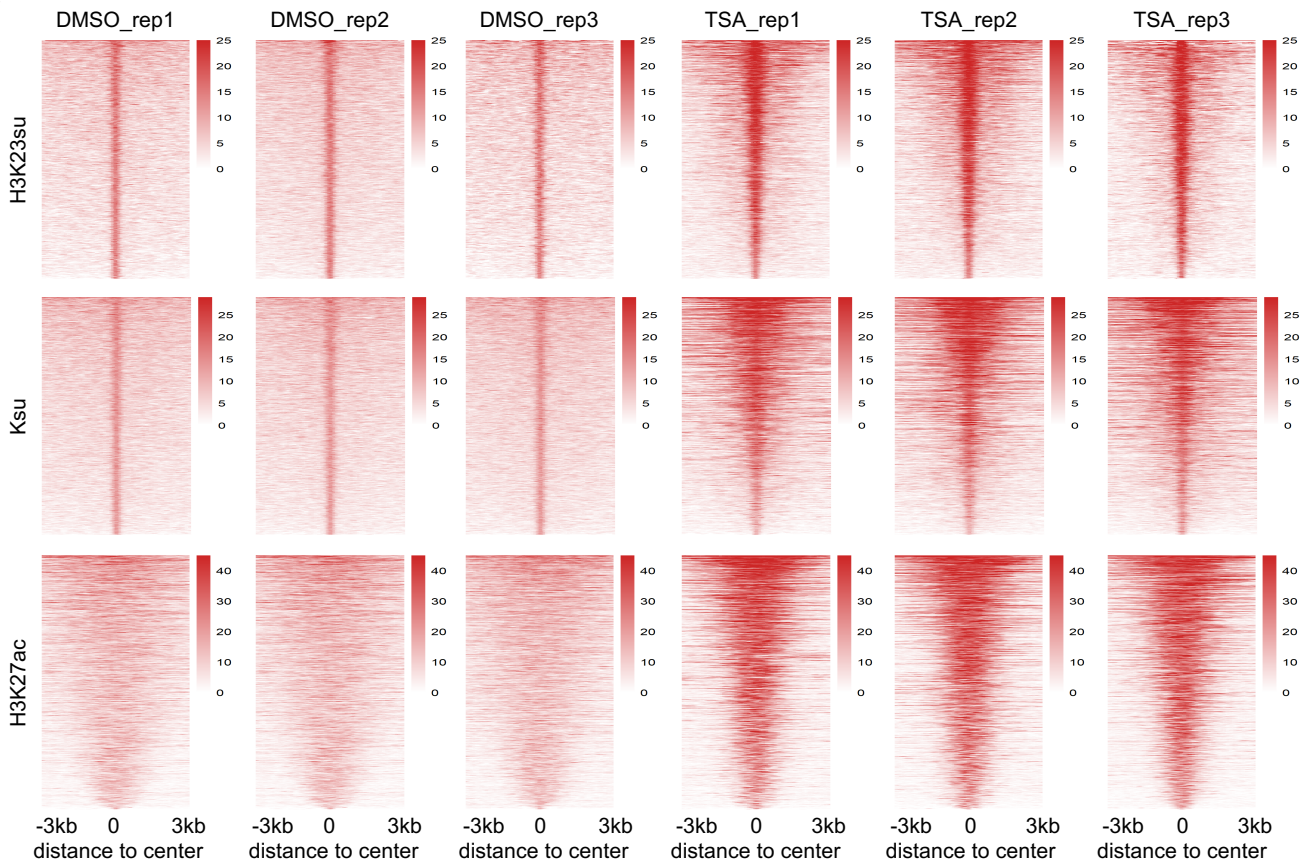

**Supplementary Fig. S8. Reproducibility of ChIP-seq biological replicates.** **a** Reads and peak numbers of the three ChIP-seq replicates of H3K23su, Ksu and H3K27ac from DMSO and TSA treated HeLa cells. **b** Heatmaps showing the Pearson's correlation coefficients of three ChIP-seq replicates of H3K23su and Ksu from DMSO and TSA treated samples. **c** Sorted and centered heatmaps of three ChIP-seq biological replicates of H3K23su, Ksu and H3K27ac from DMSO and TSA treated HeLa cells.



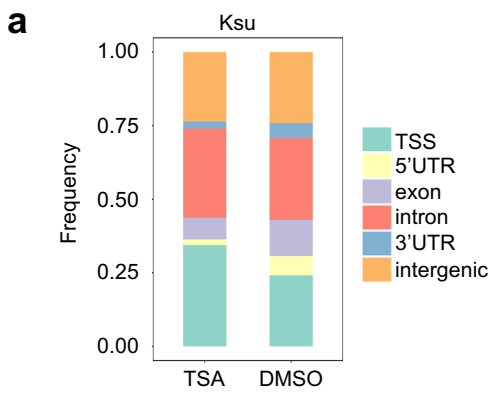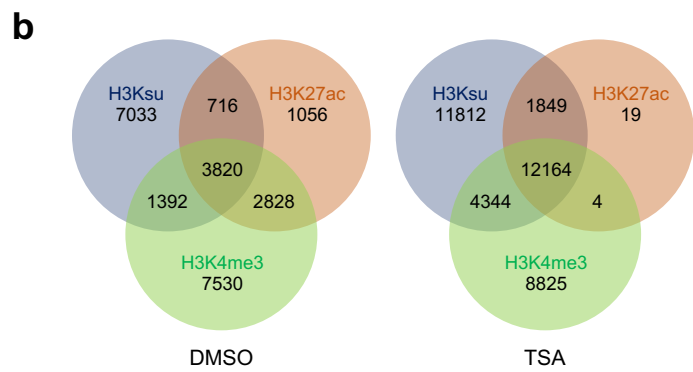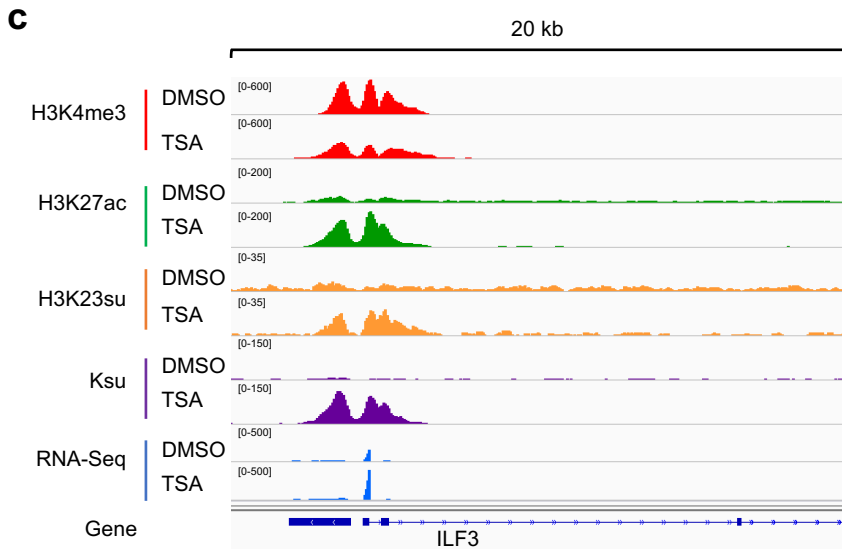

**d**

| Experiment | Raw Reads  | Mapped Reads | Mapped Ratio | Uniquely mapped Reads (MAPQ >20) | Unique ratio |
|------------|------------|--------------|--------------|----------------------------------|--------------|
| DMSO_1     | 45,462,504 | 43,536,654   | 95.76%       | 40,742,584                       | 89.61%       |
| DMSO_2     | 41,723,604 | 39,219,011   | 94.00%       | 37,228,798                       | 89.22%       |
| DMSO_3     | 48,306,864 | 46,524,614   | 96.31%       | 43,788,186                       | 90.64%       |
| TSA_1      | 45,720,652 | 43,090,662   | 94.25%       | 39,877,286                       | 87.21%       |
| TSA_2      | 45,641,018 | 43,255,776   | 94.77%       | 40,400,800                       | 88.51%       |
| TSA_3      | 47,581,918 | 44,588,238   | 93.71%       | 41,607,546                       | 87.44%       |

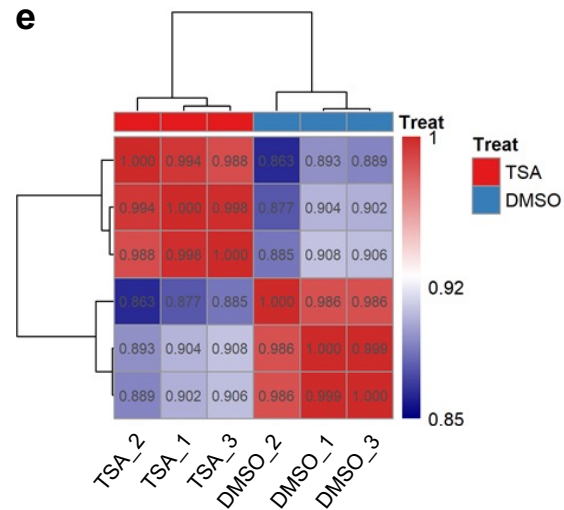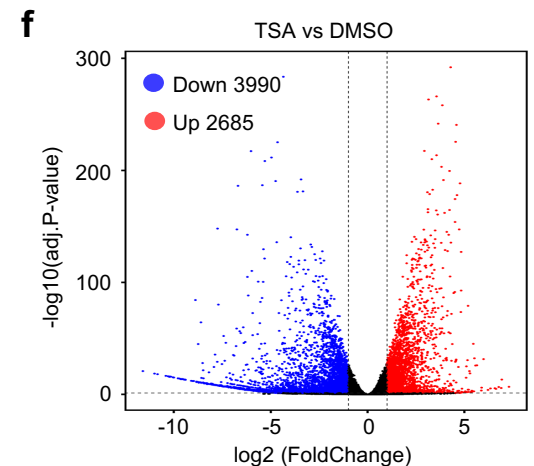

**Supplementary Fig. S9. Integrated analysis of ChIP-seq and RNA-seq.** **a** Genomic feature distribution of Ksu peaks. The relative proportion of Ksu peaks in the TSS, 5'UTR, exons, introns, 3'UTR and intergenic in TSA-treated and untreated HeLa cells were displayed. **b** Venn diagrams showing the number of Ksu peaks that show co-occupancy with H3K4me3 peaks and H3K27ac peaks in TSA-treated and untreated cells. **c** IGV browser snapshots showing the distribution of different histone modification peaks around the TSS of the actively transcribed ILF3 gene. Also shown is read peak of RNA-seq. **d** Summary of RNA-seq data. **e** Heatmap shows the Pearson's correlation coefficients of three RNA-seq replicates. **f** Volcano plot showing differentially expressed genes between DMSO and TSA treated samples,  $|\log_2(\text{FoldChange})| < -1$ ,  $p\text{-value.adj} < 0.05$ . RNA-seq analyses were performed in triplicates of biological repeats.

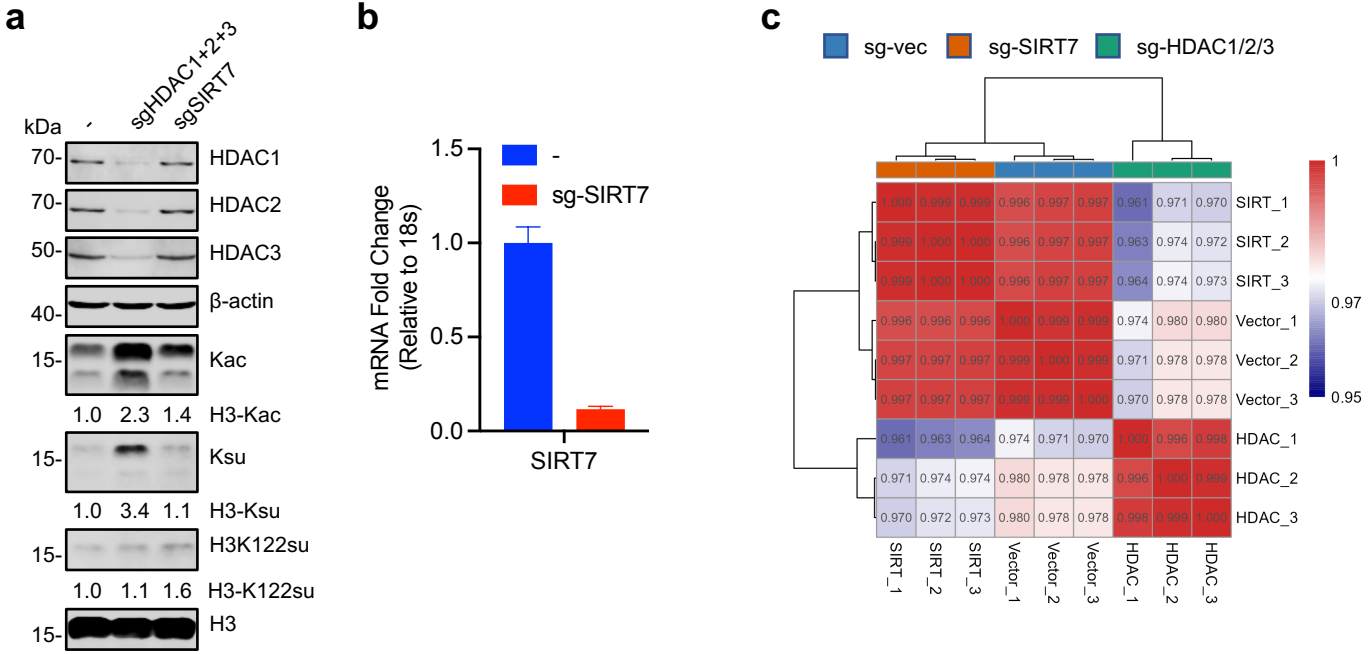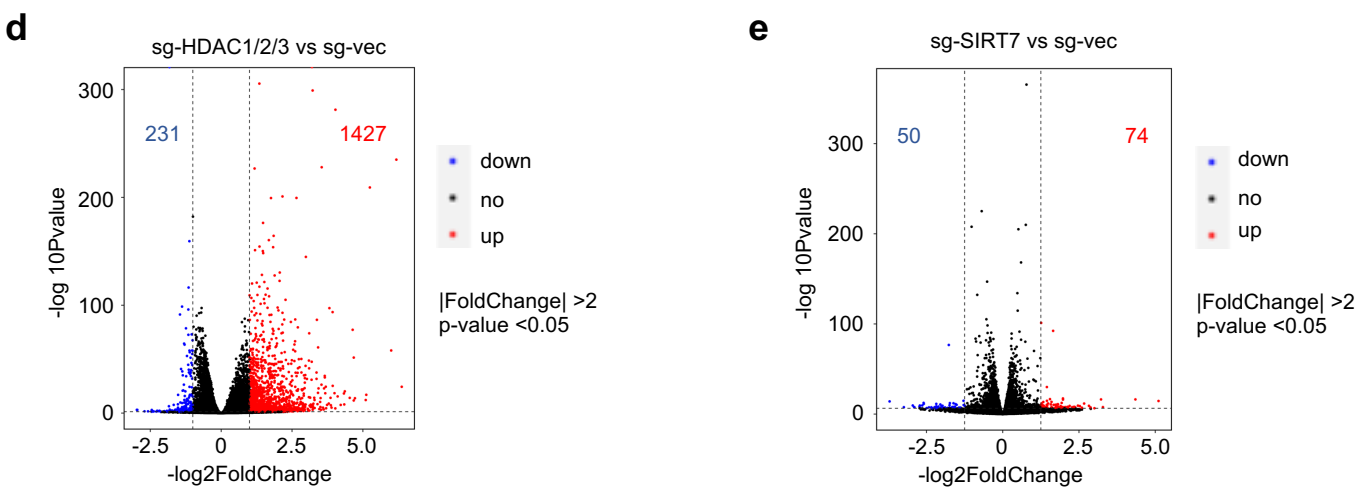

**Supplementary Fig. S10. Transcriptome analysis of HDAC1/2/3 or SIRT7 knockout HeLa cells.** **a** WB analysis of the status of histone protein succinylation and acetylation in control, HDAC1/2/3 and SIRT7 knockout HeLa cells. **b** RT-qPCR analysis showing the SIRT7 knockout efficiency in HeLa cells (SIRT7-RT-qPCR primer, forward:5'-GACCTGGTAACGGAGCTGC-3', reverse: 5'-CGACCAAGTATTTGGCGTTCC-3'). **c** Heatmap showing the Pearson's correlation coefficients of three RNA-seq replicates. **d** Volcano plot showing differentially expressed genes between HDAC1/2/3 knockout and control cells. **e** Volcano plot showing differentially expressed genes between SIRT7 knockout and control cells.

**a**

| SRR                   | cell Line  | TF/histone           | Source                                                                                                                        |
|-----------------------|------------|----------------------|-------------------------------------------------------------------------------------------------------------------------------|
| SRR11952859           | MCF7       | H3K122succ_AB#1      | Succinylation of H3K122 destabilizes nucleosomes and enhances transcription. EMBO Rep 2021 Mar 3;22(3):e51009.                |
| SRR11952860           | MCF7       | H3K122succ_AB#2      |                                                                                                                               |
| SRR11952861           | MCF7       | H3K122succ_AB#3      |                                                                                                                               |
| SRR11952858           | MCF7       | Input for H3K122succ |                                                                                                                               |
| SRR5459213            | U251 cells | H3K79succ            | KAT2A coupled with the $\alpha$ -KGDH complex acts as a histone H3 succinyltransferase. Nature, 2017 Dec 14;552(7684):273-277 |
| SRR5459215            | U251 cells | input                |                                                                                                                               |
| SRR577859 SRR577860   | MCF-7      | HDAC2                | ENCODE                                                                                                                        |
| SRR577916-SRR577919   | MCF-7      | HDAC2_input          |                                                                                                                               |
| SRR14106126           | HepG2      | HDAC1_rep1           | ENCODE                                                                                                                        |
| SRR14106127           | HepG2      | HDAC1_rep2           |                                                                                                                               |
| SRR5331189-SRR5331194 | HepG2      | HDAC1_input_rep1     |                                                                                                                               |
| SRR5331185 SRR5331186 | HepG2      | HDAC1_input_rep2     |                                                                                                                               |

**b**

| Experiment    | # Peak |
|---------------|--------|
| H3K122su_AB#1 | 5,242  |
| H3K122su_AB#2 | 5,407  |
| H3K122su_AB#3 | 4,785  |
| H3K79su       | 17,139 |
| HDAC1         | 11,436 |
| HDAC2         | 49,181 |

**c**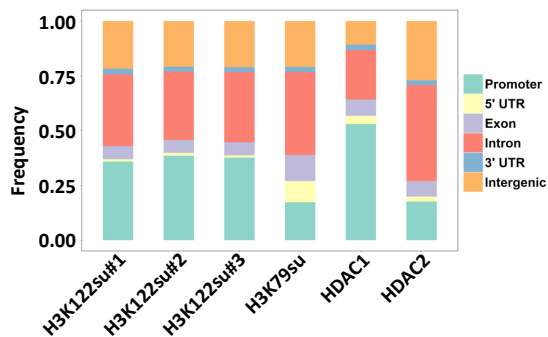**d**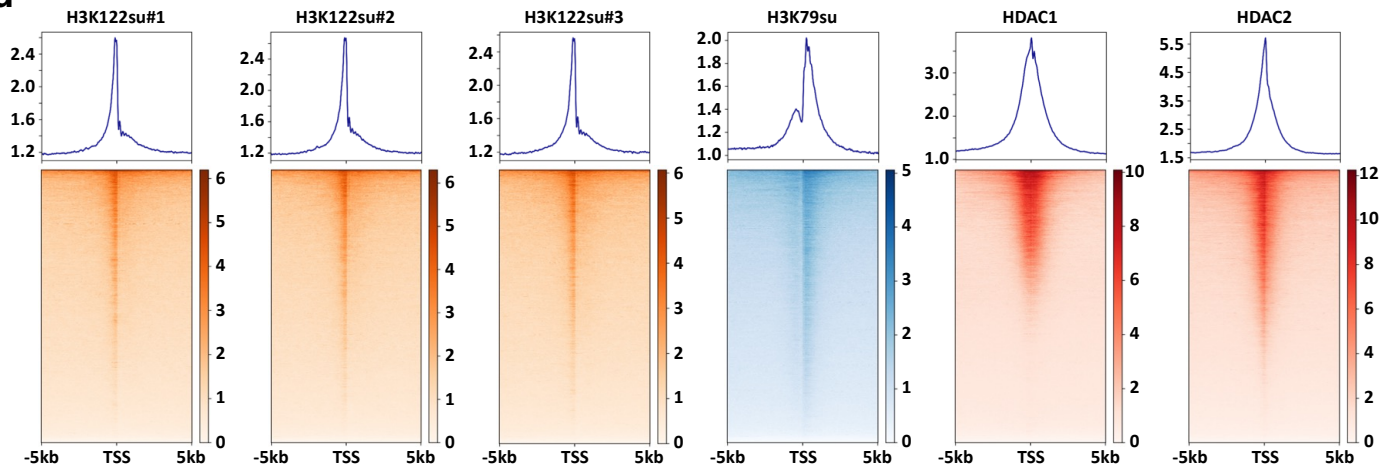

**Supplementary Fig. S11. Analysis of available ChIP-seq data.** **a** The summary of the available ChIP-seq. **b** ChIP-seq Peak numbers of H3K122su, H3K79su and HDAC1/2. **c** Genomic feature distribution of ChIP-seq peaks of H3K122su, H3K79su and HDAC1/2. **d** Sorted and centered heatmaps and the average plot show the peak intensities of H3K122su, H3K79su and HDAC1/2.
